# Supplementary material for: Whole Transcriptome Analysis Resulted in the Identification of Chinese Sprangletop (Leptochloa Chinensis) Genes Involved in Cyhalofop-Butyl Resistance
Source: Research Square preprint supplement (doi:10.21203/rs.3.rs-152066/v1), 2021-02-10
Supplement: Supplementary file 1 [file 08723c7318b2ea79e80fb4fd.docx]

**Whole transcriptome analysis resulted in the identification of Chinese sprangletop (*Leptochloa chinensis*) genes involved in cyhalofop-butyl resistance**

Ke Chen1,2,3†, Yajun Peng3†, Liang Zhang1,2, Long Wang4, Donghai Mao5, Zhenghong Zhao1，Lianyang Bai1,2,3*, Lifeng Wang1,2,3*

† Authors contributed equally to this work.

* Authors for correspondence:

Lianyang Bai, Email: bailianyang2005@aliyun.com;

Lifeng Wang；Email: ifwang@hunaas.cn.

1. Longping Branch, Graduate School of Hunan University, Changsha, P. R. China

2. Agricultural Biotechnology Research Institute, Hunan Academy of Agricultural Sciences, Changsha, P. R. China

3. Plant Protection Institute, Hunan Academy of Agricultural Sciences, Changsha, P. R. China

4. College of Biology, State Key Laboratory of Chemo/Biosensing and Chemometrics, and Hunan Province Key Laboratory of Plant Functional Genomics and Developmental Regulation, Hunan University, Changsha 410082, P. R. China.

5. Key Laboratory of Agro-Ecological Processes in Subtropical Region, Institute of Subtropical Agriculture, Chinese Academy of Sciences, Changsha 410125, P. R. China

**Supplementary material**

**Additional file 1:** Correlation pattern of each sample. Pearson correlation coefficients of samples within and between groups were calculated with the FPKM of all genes in each sample.

**Additional file 2: A)** The Volcano map of differentially expressed genes in B3vsB2. **B)** Gene ontology (GO) analysis of up-regulated-DEGs in B3vsB2. The DEGs were summarized in biological process, cellular component and molecular function. **C)** KEGG annotation of up-regulated-DEGs in B3vsB2.

**Additional file 3: A)** The Volcano map of differentially expressed genes in A3vsA2. **B)** Gene ontology (GO) analysis of up-regulated-DEGs in A3vsA2. The DEGs were summarized in biological process, cellular component and molecular function. **C)** KEGG annotation of up-regulated-DEGs in A3vsA2.

**Additional file 4: A)** The Volcano map of differentially expressed genes in B2vsB1. **B)** Gene ontology (GO) analysis of up-regulated-DEGs in B2vsB1. The DEGs were summarized in biological process, cellular component and molecular function.

**Additional file 5: A)** The Volcano map of differentially expressed genes in A2vsA1. **B)** Gene ontology (GO) analysis of up-regulated-DEGs in A2vsA1. The DEGs were summarized in biological process, cellular component and molecular function.

**Additional file 6:** FPKM distribution of each sample

**Additional file 7:** Sample number and their treatment information

**Additional file 8:** Primer information for qRT-PCR validation.
